# Supplementary material for: Multi-Scale Photoacoustic Assessment of Wound Healing Using Chitosan–Graphene Oxide Hemostatic Sponge
Source: MDPI journal article supplement (doi:10.3390/nano11112879), 2021-10-28
Supplement: s1 [file s1]

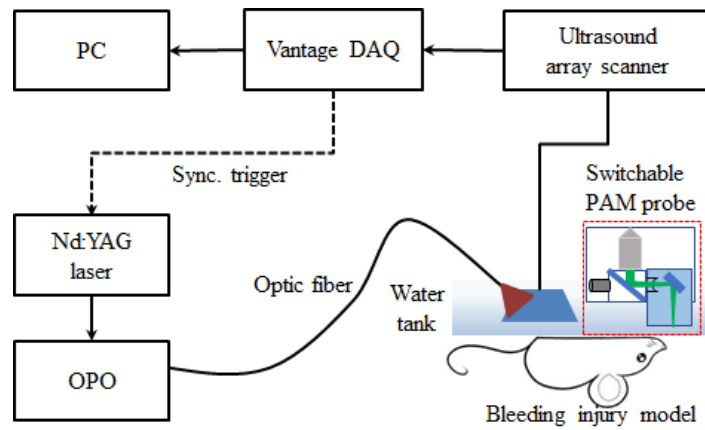

Figure S1. Schematic illustration of multi-scale optical-resolution photoacoustic microscopy and acoustic-resolution photoacoustic tomography.

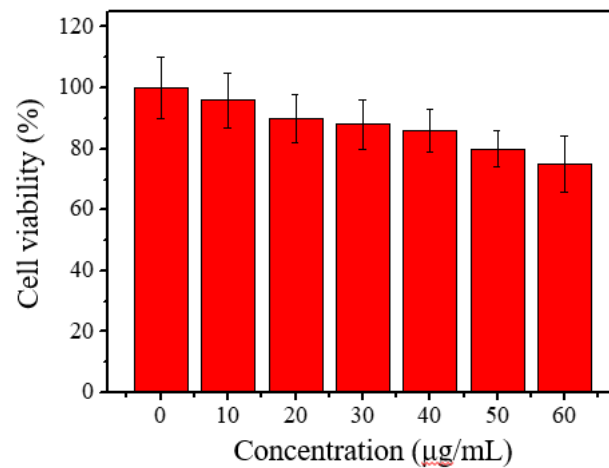

Figure S2. Biototoxicity test.

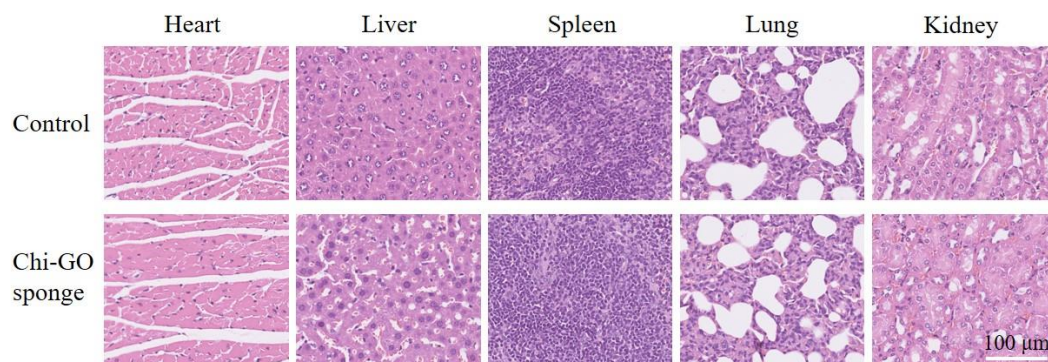

Figure S3. *In vivo* toxicity study of hemostatic sponge. H&E-stained images of major organs including heart, liver, spleen, lung, and kidney collected from mice sacrificed 7 days.

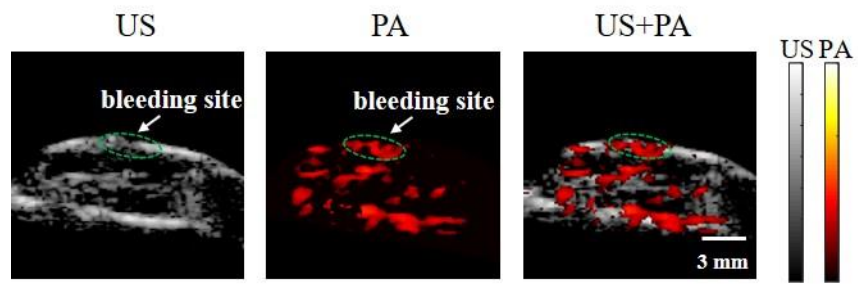

Figure S4. Ultrasound/Photoacoustic dual-modality imaging of the bleeding site after hemostatic treatment.
